# Supplementary material
Source: Copernicus journal article supplement (doi:10.5194/bg-23-2927-2026)
Supplement: Supplementary file 1 [file bg-23-2927-2026-supplement.pdf]

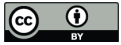

*Supplement of*

## **Conifer leaf wax acts as a source of secondary fatty alcohols in atmospheric aerosols**

**Yuhao Cui et al.**

*Correspondence to:* Yuzo Miyazaki (yuzom@lowtem.hokudai.ac.jp)

The copyright of individual parts of the supplement might differ from the article licence.

Figure S1: Sampling positions of leaves on Sakhalin fir branches, as referred to in this study.

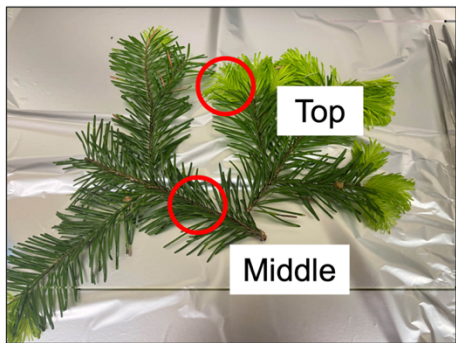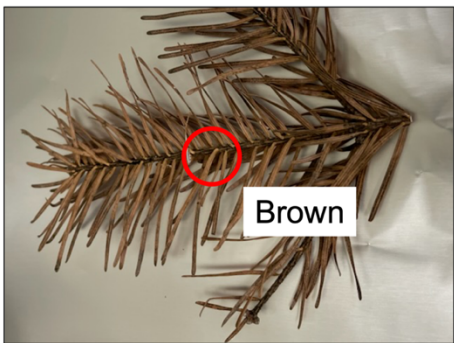

**Table S1: Concentrations of *n*-nonacosan-10-ol in each aerosol sample.**

| Season | Sampling Period     | Concentration (ng m <sup>-3</sup> ) |                                           |                                          |                                          |                                     |
|--------|---------------------|-------------------------------------|-------------------------------------------|------------------------------------------|------------------------------------------|-------------------------------------|
|        |                     | Backup<br>(D <sub>p</sub> <0.95 μm) | Stage 4<br>(D <sub>p</sub> = 0.95–1.5 μm) | Stage 3<br>(D <sub>p</sub> = 1.5–3.0 μm) | Stage 2<br>(D <sub>p</sub> = 3.0–7.2 μm) | Stage 1<br>(D <sub>p</sub> >7.2 μm) |
| Spring | May 2–9, 2024       | 76.6                                | 9.41                                      | 16.7                                     | 69.4                                     | 37.6                                |
|        | May 9–16, 2024      | 15.8                                | 0.02                                      | 53.0                                     | 23.6                                     | 44.7                                |
|        | May 16–23, 2024     | 28.3                                | 10.4                                      | 19.8                                     | 70.9                                     | 64.4                                |
| Summer | August 1–8, 2023    | 1.54                                | 0.01                                      | 1.21                                     | 1.31                                     | 0.66                                |
| Autumn | October 3–10, 2023  | 0.46                                | 0.46                                      | 1.20                                     | 1.33                                     | 0.15                                |
|        | October 10–17, 2023 | 4.89                                | 3.67                                      | 5.36                                     | 9.62                                     | 2.56                                |
|        | October 17–24, 2023 | 2.42                                | 3.01                                      | 5.31                                     | 1.46                                     | 1.35                                |

**Table S2: The mass of *n*-nonacosan-10-ol per conifer (*Abies sachalinensis*) leaf in the free and free + esterified forms from samples collected on May 9th,2024.**

| Sampling Date | Leaf weight (mg) | <i>n</i> -nonacosan-10-ol mass in free form (μg) | <i>n</i> -nonacosan-10-ol mass in the free + esterified forms (μg) |
|---------------|------------------|--------------------------------------------------|--------------------------------------------------------------------|
| May 9, 2024   | 6.69             | 77.1                                             | 78.4                                                               |
|               | 7.53             | 62.2                                             | 64.4                                                               |
|               | 5.94             | 67.9                                             | 71.5                                                               |

**Table S3: The mass of *n*-nonacosan-10-ol per Sakhalin fir (*Abies sachalinensis*) leaf in different position of one branch in spring (25 May 2023) and autumn (3 Oct 2023).**

| Season | Sampling date   | Sampling position | Leaf weight (mg) | <i>n</i> -nonacosan-10-ol mass (μg) |
|--------|-----------------|-------------------|------------------|-------------------------------------|
| Spring | May 25, 2023    | Top               | 3.16             | 41.5                                |
|        |                 |                   | 2.93             | 44.8                                |
|        |                 |                   | 3.22             | 40.7                                |
|        |                 | Middle            | 15.5             | 90.3                                |
|        |                 |                   | 10.6             | 94.0                                |
|        |                 |                   | 10.2             | 102.7                               |
| Autumn | October 3, 2023 | Top               | 3.59             | 39.4                                |
|        |                 |                   | 2.70             | 36.9                                |
|        |                 |                   | 3.01             | 20.6                                |
|        |                 | Middle            | 3.26             | 63.8                                |
|        |                 |                   | 4.57             | 68.3                                |
|        |                 |                   | 2.57             | 69.3                                |
|        |                 | Brown             | 3.06             | 133.9                               |
|        |                 |                   | 3.24             | 165.8                               |
|        |                 |                   | 3.24             | 147.3                               |

**Table S4: Mass of *n*-nonacosan-10-ol in each leaf sample.**

| Season | Sampling Date    | Leaf weight (mg) | <i>n</i> -nonacosan-10-ol mass ( $\mu\text{g}$ ) |
|--------|------------------|------------------|--------------------------------------------------|
| Spring | May 9, 2024      | 8.46             | 78.9                                             |
|        | May 16, 2024     | 6.69             | 50.1                                             |
|        | May 23, 2024     | 4.17             | 57.2                                             |
| Summer | August 1, 2023   | 2.60             | 16.9                                             |
|        |                  | 4.51             | 14.3                                             |
|        |                  | 4.58             | 17.3                                             |
| Autumn | October 3, 2023  | 3.26             | 63.8                                             |
|        | October 17, 2023 | 10.4             | 53.8                                             |
|        | October 31, 2023 | 6.37             | 57.2                                             |
| Winter | January 30, 2024 | 6.65             | 2.60                                             |
|        |                  | 5.56             | 2.43                                             |
|        |                  | 9.09             | 1.94                                             |
